# Supplementary material
Source: Springer Nature journal article supplement (https://www.springermedizin.de/resource/supplementary/12889_2007_1028_MOESM2_ESM.pdf/9503168)

units  
p/d

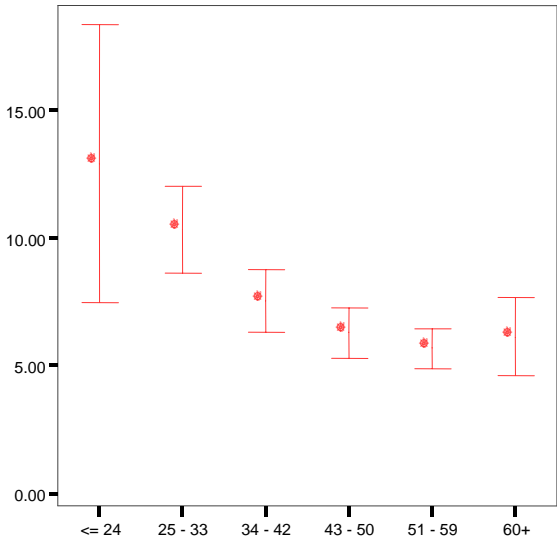

age

Supplement: MOESM2 [file 9503168]
